# Supplementary material for: A dumbbell probe-based dual signal amplification strategy for sensitive detection of multiple DNA methyltransferases
Source: Royal Society of Chemistry journal article supplement (doi:10.1039/d0cc05991a), 2020-01-01
Supplement: d0cc05991a1.pdf [file d0cc05991a1.pdf]

Electronic Supplementary Information

**A dumbbell probe-based dual signal amplification strategy for sensitive detection of multiple DNA methyltransferases**

Yueying Li,<sup>a,‡</sup> Shuli Sun,<sup>a,‡</sup> Xiaorui Tian,<sup>a,‡</sup> Bing-jie Liu,<sup>b</sup> BingHua Jiang,<sup>b,\*</sup> Chun-yang Zhang<sup>a,\*</sup>

<sup>a</sup> College of Chemistry, Chemical Engineering and Materials Science, Collaborative Innovation Center of Functionalized Probes for Chemical Imaging in Universities of Shandong, Key Laboratory of Molecular and Nano Probes, Ministry of Education, Shandong Provincial Key Laboratory of Clean Production of Fine Chemicals, Shandong Normal University, Jinan 250014, PR China.

<sup>b</sup> Academy of Medical Sciences, Zhengzhou University, Zhengzhou, Henan, 450000, China.

\* Corresponding author. Tel.: +86 0531-86186033; Fax: +86 0531-82615258. E-mail: cyzhang@sdnu.edu.cn; bhjiang@zzu.edu.cn.

‡ These authors contributed equally.

## EXPERIMENTAL SECTION

**Materials.** All the oligonucleotides (Table S1) were synthesized by Sangon Biotech Co., Ltd. (Shanghai, China) except that circular templates 1 and 2 were synthesized by Takara Biotechnology Co., Ltd. (Dalian, China). The DNA adenine methyltransferase (Dam), CpG Methyltransferase (M.SssI), Vent (exo-) DNA polymerase, Nb.BtsI, DpnI, T4 DNA Ligase, Exonuclease I (Exo I), Exonuclease III (Exo III), Endonuclease IV (Endo IV), T4 polynucleotide kinase (PNK), uracil DNA glycosylase (UDG) and deoxynucleotide solution mix (dNTP) were purchased from New England Biolabs (Beverly, MA, USA). Restriction endonuclease *GlaI* (*GlaI*) were purchased from SibEnzyme Ltd (Novosibirsk, Russia). The 5-fluorouracil, bovine serum albumin (BSA), and immunoglobulin G (IgG) were purchased from Sigma-Aldrich Company (St. Louis, MO, USA). Lung adenocarcinoma cell lines (A549 cells) were obtained from the Cell Bank, Shanghai Institutes for Biological Sciences, Chinese Academy of Sciences (Shanghai, China).

**Table S1.** Sequences of the oligonucleotides <sup>a</sup>

| name                | sequence (5'-3')                                                                                                                                                             |
|---------------------|------------------------------------------------------------------------------------------------------------------------------------------------------------------------------|
| dumbbell probe      | CAG TTC CTC <b>GAT</b> CTT GAT AGG GAG ACA AGA <b>TCG</b> AGG<br>AAC TGG TGT GTC <i>G<sup>m</sup>CG</i> CGA AAG AAG AAA GAC AGA AAT<br>TTC <i>G<sup>m</sup>CG</i> CGA CAC AC |
| circular template 1 | CTA TCA AGA TAA <u>GCA GTG</u> TCG TCA TAG CCC TAC TAC<br>TCA TCT TGT CTC C                                                                                                  |
| circular template 2 | TGT CTT TCT TCT TTC GCT <u>ATG CAG TGT</u> TCT GGA TAG<br>TGA TGC TAG GGC GAA ATT TC                                                                                         |
| signal probe 1      | CAT AGC CXT ACT ACT                                                                                                                                                          |
| signal probe 2      | GGA TAG TXA TGC TAG                                                                                                                                                          |

<sup>a</sup> In dumbbell probe, the boldface regions indicate the recognition sequence of Dam, and the italic regions indicate the recognition sequence of M.SssI, and the mC indicates 5-methylcytosine. In circular templates 1 and 2, the underlined regions indicate the recognition sequence of Nb.BtsI. In signal probes 1 and 2, the “X” indicates the abasic site mimic.

**Preparation of dumbbell probes.** The 2  $\mu$ L of 100  $\mu$ M dumbbell probe, 1.5  $\mu$ L of 10 $\times$  T4 DNA Ligase buffer (500 mM Tris-HCl, 100 mM MgCl<sub>2</sub>, 100 mM DTT, 10 mM ATP, pH 7.5) were incubated at 95 °C for 5 min with a final volume of 10  $\mu$ L, followed by slowly cooling to room temperature. Then the DNA ligase reaction was performed in 15  $\mu$ L of reaction mixture containing 100 U of T4 DNA Ligase and 10  $\mu$ L of the above mixture at 16 °C overnight, followed by inactivation at 65 °C for 10 min. Subsequently, the exonuclease digestion reaction was performed in 20  $\mu$ L of reaction mixture containing 10 U of Exo I, 10 U of Exo III, 1 $\times$  NEBuffer 1 (10 mM Bis Tris Propane-HCl, 10 mM MgCl<sub>2</sub>, 1 mM DTT, pH 7.0), and 1 $\times$  Exonuclease I reaction buffer (67 mM glycine-KOH, 6.7 mM MgCl<sub>2</sub>, 10 mM b-ME, pH 9.5) and 15  $\mu$ L of DNA ligase reaction solution at 37 °C for 30 min, and the reaction was terminated by incubation at 80 °C for 20 min. The obtained dumbbell probes were stored at 4 °C prior to use.

**Methylation and cleavage of dumbbell probes.** The methylation and cleavage reactions were performed in 20  $\mu$ L of reaction mixture containing 500 nM dumbbell probe, 1 $\times$  SEBuffer Y (33 mM Tris-Ac, 10 mM MgAc<sub>2</sub>, 66 mM KAc, 1 mM DTT, pH 7.9), 8 U of DpnI, 10 U of GluI, 160  $\mu$ M SAM and various concentrations of Dam and M.SssI. The mixture was incubated at 37 °C for 2 h, and then the reaction was terminated by incubation at 80 °C for 20 min.

**Rolling circle amplification reaction.** After methylation and cleavage reactions, 10  $\mu$ L of products were added to 30  $\mu$ L of annealing reaction mixture containing 50 nM circular template 1, 50 nM circular template 2, 5 mM MgCl<sub>2</sub>, 10 mM Tris-HCl. The mixture was heated at 95 °C for 5 min, followed by slowly cooling to room temperature.

Then the RCA reaction was performed in 50  $\mu$ L of reaction mixture containing 30  $\mu$ L of annealing products, 1 U of Vent (exo-) DNA polymerase, 10 U of Nb.BbtsI and 1 $\times$  Cutsmart buffer (50 mM KAc, 20 mM Tris-Ac, 10 mM MgAc<sub>2</sub>, 100  $\mu$ g/mL BSA, pH 7.9) at 55 °C for 1 h. The reaction was terminated by heating at 80 °C for 20 min.

**Endo IV-assisted signal amplification and fluorescence measurement.** The 30  $\mu$ L of RCA products, 500 nM signal probe 1, 500 nM signal probe 2, 1 $\times$  NEBuffer 3 (100 mM NaCl, 50 mM Tris-HCl, 10 mM MgCl<sub>2</sub>, 1 mM DTT, pH 7.9), and 10 U of Endo IV were added to the reaction solution with a final volume of 50  $\mu$ L, followed by incubation at 37 °C for 90 min. The reaction was terminated by incubation at 80 °C for 20 min.

We measured the fluorescence intensity of reaction products (50  $\mu$ L) using F-7000 spectrometer (Hitachi, Japan). The fluorescence intensities at 567 nm for Cy3 and 668 nm for Cy5 were used for data analysis, respectively. The emission spectra were recorded over the wavelength range of 550 – 650 nm for Cy3 and 650 - 750 nm for Cy5, with a slit width of 5 nm for both excitation and emission. The  $F - F_0$  value is used to calculate the concentration of MTase based on the obtained regression equation, where  $F_0$  and  $F$  are the fluorescence intensity in the absence and presence of MTase, respectively.

**Gel Electrophoresis.** The products of methylation and cleavage reactions were analyzed by 12% non-denaturing polyacrylamide gel electrophoresis (PAGE) in 1 $\times$  TBE buffer (9 mM Tris-HCl, pH 8.3, 9 mM boric acid, 0.2 mM EDTA) at a 110 V constant voltage for 50 min by using an illumination source of Epi-blue (460 – 490 nm excitation) and a 516 – 544 nm filter for SYBR Gold fluorophores. The products of dual DNA amplification reaction were analyzed by 12% non-denaturing polyacrylamide gel electrophoresis (PAGE) in 1 $\times$  TBE buffer at a 110 V constant voltage for 30 min. The fluorescent DNA fragments of reaction products were analyzed by using an illumination source of Epi-green (520 – 545 nm excitation) and a 577 – 613 nm filter for Cy3 fluorophores, and an illumination source of Epi-red (625 – 650 nm excitation) and a 675 – 725 nm filter for Cy5 fluorophores.

**Inhibition Assay.** Various concentrations of 5-fluorouracil were incubated with 500 nM dumbbell probes in 1 $\times$

SEBuffer Y (33 mM Tris-Ac, 10 mM MgAc<sub>2</sub>, 66 mM KAc, 1 mM DTT, pH 7.9) at 37 °C for 15 min. Then 40 U/mL Dam, 40 U/mL M.SssI, 160 μM SAM, 8 U of DpnI, and 10 U of GluI were added to the mixture and incubated at 37 °C for 2 h, and the subsequent experiments were carried out according to the procedures of MTase assay described above. The relative activity (*RA*) of DNA MTase was quantitatively calculated according to equation S1.

$$RA (\%) = \frac{F_i - F_0}{F_t - F_0} \times 100\% \quad (S1)$$

where  $F_0$ ,  $F_t$ ,  $F_i$  are the fluorescence intensity in the absence of DNA MTase, in the presence of DNA MTase, and in the presence of both DNA MTase and inhibitor, respectively. The IC<sub>50</sub> value of inhibitor was obtained from the curve-fitting equation.

**Cell Culture and Preparation of Cell Extracts.** The lung adenocarcinoma cell line (A549 cells) was cultured in Dulbecco's modified Eagle's medium (DMEM) supplemented with 10% fetal bovine serum (FBS) and 1% penicillin-streptomycin at 37 °C in a humidified atmosphere containing 5% CO<sub>2</sub>. The  $1 \times 10^6$  cells were collected and washed twice with  $1 \times$  PBS (pH 7.4). The number of cells was measured by Countstar automated cell counter (IC1000, Wilmington, DE, USA). The nuclear extracts of A549 cells were prepared by using the nuclear extract kit (ActiveMotif, Carlsbad, CA, USA) according to the manufacturer's protocol. The obtained supernatant was subjected to recovery assay.

**Detection of MTase activity in human serum and cell extracts.** The 20 μL of sample containing 5% human serum (or 5 μL of cell extracts), 500 nM dumbbell probe,  $1 \times$  SEBuffer Y, 8 U of DpnI, 10 U of GluI, 160 μM SAM, and various concentrations of DNA MTase was incubated at 37 °C for 2 h, followed by inactivation at 80 °C for 20 min. Then the DNA MTase activity was calculated based on the fitting equation (inset of Fig. 3A for Dam and Fig. 3B for M.SssI). The recovery ratio (*R*) is calculated based on equation S2:

$$R(\%) = \frac{C_m}{C_0} \times 100\% \quad (S2)$$

where  $C_m$  and  $C_0$  represent the MTase concentration in the presence and absence of human serum (or A549 cell extracts), respectively.

## RESULTS AND DISCUSSION

**Optimization of methylation and MTases-mediated cleavage reaction.** The methylation and cleavage reaction involves four kinds of enzymes (i.e., Dam, DpnI, M.SssI and Glal) and three different buffers (i.e., 1× Dam buffer, 1× NEBuffer 2, and 1× SEBuffer Y). The 1× Dam buffer (10 mM EDTA, 50 mM Tris-HCl, 5 mM 2-mercaptoethanol, pH 7.5) is for Dam, and 1× NEBuffer 2 (50 mM NaCl, 10 mM Tris-HCl, 10 mM MgCl<sub>2</sub>, 1 mM DTT, pH 7.9) is for DpnI and M.SssI, and 1× SEBuffer Y (33 mM Tris-Ac, 10 mM MgAc<sub>2</sub>, 66 mM KAc, 1 mM DTT, pH 7.9) is for Glal. To obtain the optimal reaction buffer, we investigated the assay performance using Dam buffer, NEBuffer 2, SEBuffer Y and different mixture buffers (NEBuffer 2 + Dam buffer, Dam buffer + SEBuffer Y, NEBuffer 2+ SEBuffer Y, Dam buffer + NEBuffer 2+ SEBuffer Y), respectively. As shown in Fig. S1A, the highest  $F/F_0$  value is obtained using SEBuffer Y for Cy3 and Cy5, respectively. Thus, SEBuffer Y is used in the subsequent research. To obtain the best performance of DNA MTase assay, the methylation reaction time was optimized. As shown in Fig. S1B, the  $F/F_0$  value enhances with the reaction time and reaches the plateau at 2 h for Cy3 and Cy5, respectively. Therefore, the methylation reaction time of 2 h is used in the subsequent research. We further optimized the amounts of DpnI and Glal, respectively. As shown in Fig. S1C, the  $F/F_0$  value of Cy3 enhances with the increasing amount of DpnI and reaches the plateau at 8 U. As shown in Fig. S1D, the  $F/F_0$  value of Cy5 enhances with the increasing amount of Glal and reaches the highest value at the amount of 10 U, followed by the decrease beyond the amount of 10 U. Therefore, 8 U of DpnI and 10 U of Glal are used in the subsequent experiments.

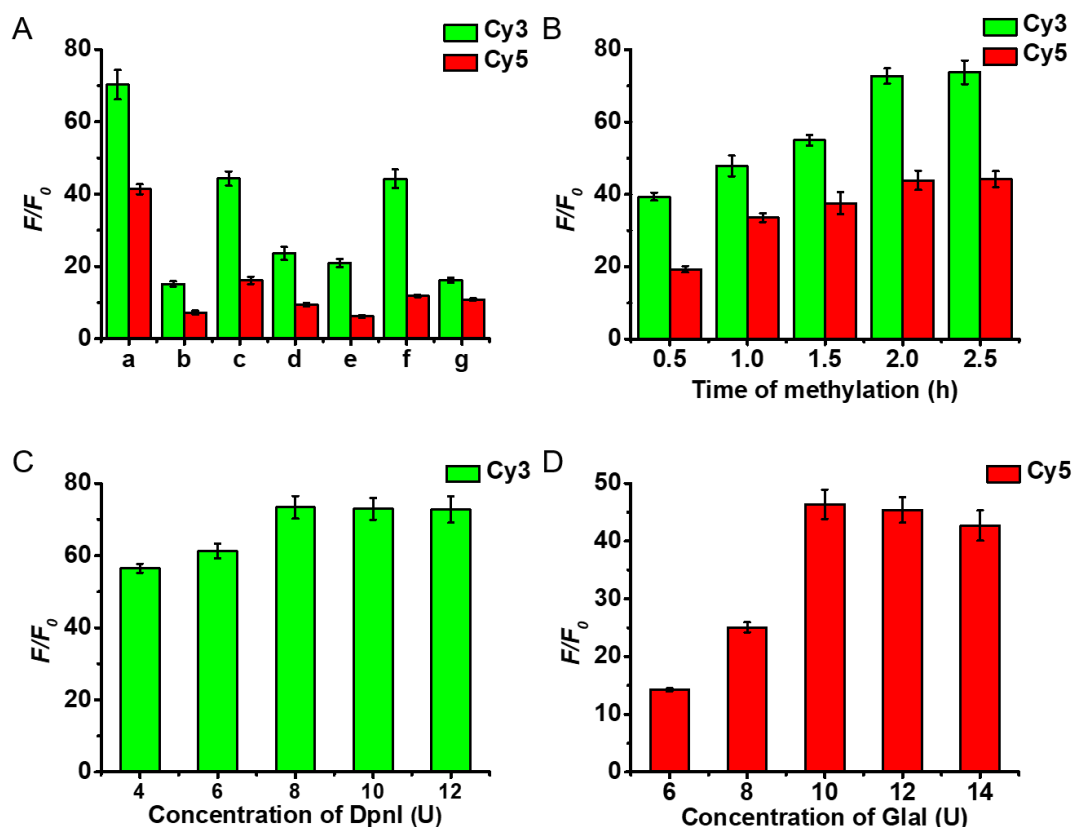

**Fig. S1** (A) Variance of  $F/F_0$  value with different buffers. a, 1× SEBuffer Y; b, 1× Dam buffer; c, 1× NEBuffer 2; d, 1× NEBuffer 2 + 1× SEBuffer Y; e, 1× NEBuffer 2 + 1× Dam buffer; f, 1× Dam buffer + 1× SEBuffer Y; g, 1× Dam buffer + 1× NEBuffer 2 + 1× SEBuffer Y. (B) Variance of  $F/F_0$  value with the methylation time. (C) Variance of  $F/F_0$  value with different concentrations of DpnI. (D) Variance of  $F/F_0$  value with different concentrations of Glal.  $F$  and  $F_0$  are the fluorescence signals in the presence and absence of Dam and M.SssI, respectively. The Cy3 signal is indicated by green, and the Cy5 signal is indicated by red. The 40 U/mL Dam and 40 U/mL M.SssI are used in the experiments. Error bars show the standard deviation of three experiments.

**Optimization of RCA reaction.** To obtain the best performance of RCA reaction, we optimized the concentrations of circular templates. As shown in Fig. S2A, the  $F/F_0$  value of Cy3 enhances with the increasing concentration of circular template 1 and reaches the highest value at the concentration of 30 nM, followed by the decrease beyond the concentration of 30 nM. Similarly, the  $F/F_0$  value of Cy5 enhances with the increasing concentration of circular template 2 and reaches the highest value at the concentration of 30 nM, followed by the decrease beyond the concentration of 30 nM (Fig. S2B). Therefore, the optimal concentration is determined to be 30 nM for circular templates 1 and 2, respectively. The close cooperation of DNA polymerase and nicking enzyme is crucial for



efficient nucleic acid amplification.<sup>1</sup> The concentration of Vent (exo-) DNA polymerase influences the efficiency of RCA reaction. As shown in the Fig. S2C, the  $F/F_0$  value of Cy3 improves with the increasing amount of Vent (exo-) DNA polymerase from 0.2 U to 1 U, followed by the decrease beyond the amount of 1 U. Similarly, the  $F/F_0$  value of Cy5 improves with the increasing amount of Vent (exo-) DNA polymerase from 0.2 U to 1 U, followed by the decrease beyond the amount of 1 U. Thus, 1 U of Vent (exo-) DNA polymerase is used in the subsequent experiments. We further investigated the influence of Nb. BtsI amount upon the  $F/F_0$  value at a fixed amount of Vent (exo-) DNA polymerase (1 U). As shown in the Fig. S2D, the  $F/F_0$  value of Cy3 improves with the increasing amount of Nb. BtsI from 6 U to 10 U, followed by the decrease beyond the amount of 10 U. Similarly, the  $F/F_0$  value of Cy5 improves with the increasing amount of Nb. BtsI from 6 to 10 U, followed by the decrease beyond the amount of 10 U. Thus, 10 U of Nb. BtsI is used in the subsequent experiments. We optimized the influence of dNTP concentration upon the fluorescence signal as well. As shown in the Fig. S2E, the  $F/F_0$  value of Cy3 improves with the increasing concentration of dNTP from 200  $\mu$ M to 400  $\mu$ M, followed by the decrease beyond the concentration of 400  $\mu$ M. Similarly, the  $F/F_0$  value of Cy5 improves with the increasing concentration of dNTP from 200 to 400  $\mu$ M, followed by decrease beyond the concentration of 400  $\mu$ M (Fig. S2E). Thus, 400  $\mu$ M dNTP is used in the subsequent experiments.

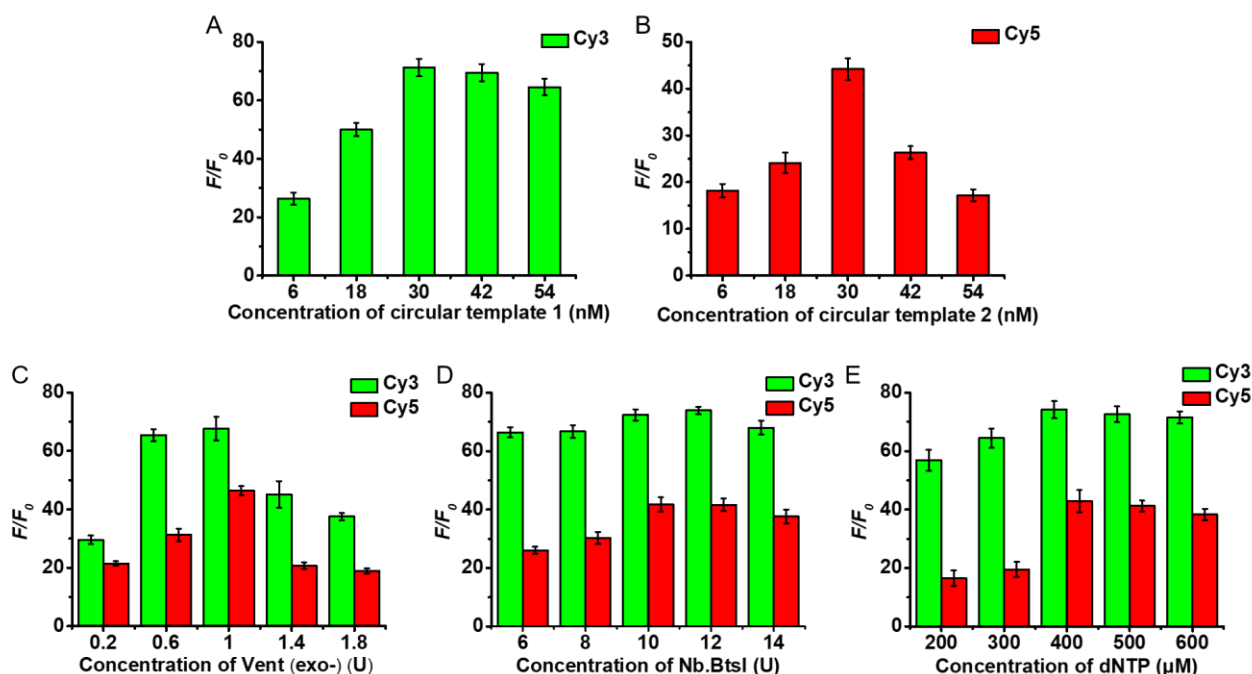

**Fig. S2** (A) Variance of  $F/F_0$  value of Cy3 with different concentrations of circular template 1. (B) Variance of  $F/F_0$  value of Cy5 with different concentrations of circular template 2. (C) Variance of  $F/F_0$  value with different concentrations of Vent (exo-). (D) Variance of  $F/F_0$  value with different concentrations of Nb.BtsI. (E) Variance of

$F/F_0$  value with different concentrations of dNTP.  $F$  and  $F_0$  are the fluorescence intensity in the presence and absence of Dam and M.SssI, respectively. The Cy3 signal is indicated by green, and the Cy5 signal is indicated by red. The 40 U/mL Dam and 40 U/mL M.SssI are used in the experiments. Error bars show the standard deviation of three experiments.

**Optimization of Endo IV-assisted amplification reaction.** We investigated the effect of the concentrations of signal probes and the amount of Endo IV upon the assay performance. The  $F/F_0$  value of Cy3 enhances with the increasing amounts of Endo IV from 5 U to 10 U, followed by the decrease beyond the amount of 10 U (Fig. S3A). Similarly, the  $F/F_0$  value of Cy5 improves with the increasing amounts of Endo IV from 5 U to 10 U, followed by the decrease beyond the amount of 10 U. Therefore, 10 U of Endo IV is used in the subsequent experiments. We studied the effect of the concentrations of signal probes upon the fluorescence signal with the amount of Endo IV being fixed at 10 U. The  $F/F_0$  value of Cy3 enhances with the increasing concentration of signal probe 1 from 200 nM to 500 nM, followed by the decrease beyond the concentration of 500 nM (Fig. S3B). Similarly, the  $F/F_0$  value of Cy5 improves with the increasing concentration of signal probe 2 from 200 to 500 nM, followed by the decrease beyond the concentration of 500 nM (Fig. S3C). Therefore, 500 nM signal probe 1 and 500 nM signal probe 2 are used in the subsequent experiments.

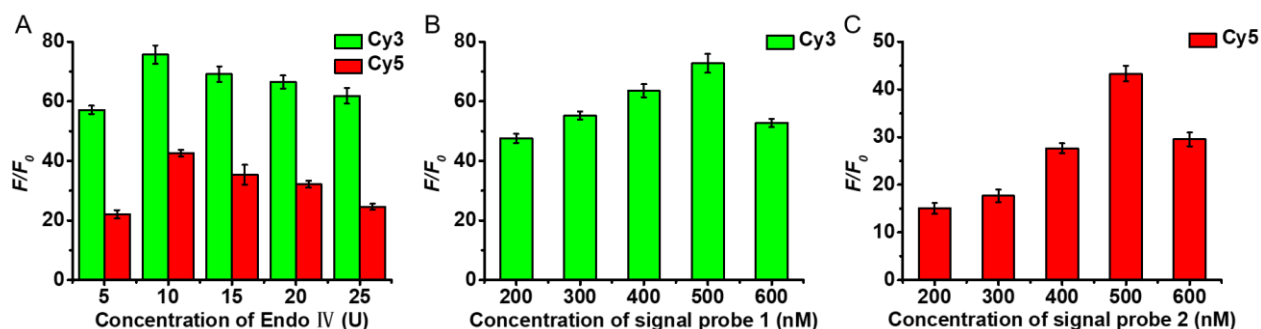

**Fig. S3** (A) Variance of  $F/F_0$  value with the different amounts of Endo IV. (B) Variance of  $F/F_0$  value with different concentrations of signal probe 1. (C) Variance of  $F/F_0$  value with different concentrations of signal probe 2.  $F$  and  $F_0$  are the fluorescence intensity in the presence and absence of Dam and M.SssI, respectively. The Cy3 signal is indicated by green, and the Cy5 signal is indicated by red. The 40 U/mL Dam and 40 U/mL M.SssI are used in the experiments. Error bars show the standard deviation of three experiments.

**Detection selectivity.** To evaluate the selectivity of the proposed method, we used bovine serum albumin (BSA), immunoglobulin G (IgG), uracil DNA glycosylase (UDG), and T4 polynucleotide kinase (PNK) as the negative controls. As shown in the Fig. S4, a high Cy3 fluorescence signal is detected only in response to Dam, and a high Cy5 fluorescence signal is detected only in response to M.SssI. Moreover, both high Cy3 and Cy5 fluorescence signals can be detected simultaneously when both Dam and M.SssI are present. In contrast, neither Cy3 nor Cy5 fluorescence signal can be observed in the presence of BSA, IgG, UDG and PNK. This may be explained by the fact that the 5'-G-A-T-C-3' in the dumbbell probe can only be methylated by Dam and the 5'-G-mC-G-C-3' in the dumbbell probe can only be methylated by M.SssI. These results demonstrate the good selectivity of the proposed method toward Dam and M.SssI.

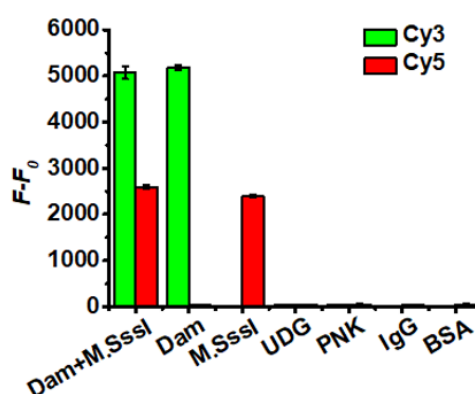

**Fig. S4** Variance of the  $F-F_0$  value of Cy3 (green column) and Cy5 (red column) in response to 40 U/mL Dam + 40 U/mL M.SssI, 40 U/mL Dam, 40 U/mL M.SssI, 40 U/mL UDG, 40 U/mL PNK, 10  $\mu$ g/mL IgG ,10  $\mu$ g/mL BSA , respectively. Error bars show the standard deviation of three experiments.

**Measurement of MTases activity in complex biological samples.** To investigate the feasibility of the proposed method for real sample analysis, we assessed the recovery of Dam by adding varying amounts of Dam (0.001–5 U/mL) to the human serum samples. As shown in Table S2, the recovery ratio is calculated to be 98.2% – 105.4% with a relative standard deviation (RSD) of 2.5% – 4.0 %. In addition, we assessed the recovery of M.SssI by

adding varying amounts of M.SssI (0.001 – 5 U/mL) to the human serum samples. As shown in Table S3, the recovery ratio is calculated to be 101.0% – 102.2% with a relative standard deviation (RSD) of 0.79% – 1.26%. Moreover, this method can be used to detect DNA MTases in cell lysates extracted from A549 lung cancer cells. As shown in Fig. S5, the fluorescence intensities of both Cy3 and Cy5 in the cell lysates and human serum are consistent with those obtained in reaction buffer, indicating that the proposed method can specifically detect Dam and M.SssI activities in real samples. Moreover, we measured the recovery of DNA MTases by spiking different concentrations of DNA MTases to the A549 cancer cell extracts (Tables S4 – S5), which are consistent with the results obtained by using the spiked human serum samples (Tables S2 and S3). We assessed the recovery of Dam by adding different amounts of Dam (0.001 U/mL – 5 U/mL) to the cell extracts. As shown in Table S4, the recovery ratio is calculated to be 92.0% – 101.0 % with a relative standard deviation (RSD) of 1.4% – 2.2%. In addition, we assessed the recovery of M.SssI by adding different amounts of M.SssI (0.001 U/mL – 5 U/mL) into the cell extracts. As shown in Table S5, the recovery ratio is calculated to be 97.8% – 99.1% with a relative standard deviation (RSD) of 1.3% – 1.7%. These results demonstrate that the proposed method may be used for the sensitive detection of DNA MTase activity in complex biological samples. Those results demonstrate that the proposed method can be used for sensitive detection of multiple DNA MTases in complex biological samples.

**Table S2.** Recovery studies of Dam in the spiked serum samples.

| sample | added (U/mL) | measured (U/mL)       | recovery (%) | RSD (%) |
|--------|--------------|-----------------------|--------------|---------|
| 1      | 5.0          | 5.27                  | 105.4        | 2.5     |
| 2      | 1.0          | 0.96                  | 95.7         | 3.9     |
| 3      | 0.1          | $1.06 \times 10^{-1}$ | 105.9        | 4.1     |
| 4      | 0.01         | $1.08 \times 10^{-2}$ | 107.7        | 5.5     |
| 5      | 0.001        | $9.82 \times 10^{-4}$ | 98.2         | 4.0     |

**Table S3.** Recovery studies of M.SssI in the spiked serum sample.

| sample | added (U/mL) | measured (U/mL)       | recovery (%) | RSD (%) |
|--------|--------------|-----------------------|--------------|---------|
| 1      | 5.0          | 5.11                  | 102.2        | 1.26    |
| 2      | 1.0          | 0.98                  | 98.4         | 0.45    |
| 3      | 0.1          | $9.96 \times 10^{-2}$ | 99.6         | 0.69    |
| 4      | 0.01         | $1.03 \times 10^{-2}$ | 103.0        | 3.56    |
| 5      | 0.001        | $1.01 \times 10^{-3}$ | 101.0        | 0.79    |

**Table S4.** Recovery studies of Dam in the spiked A549 cell extracts.

| sample | added (U/mL) | measured (U/mL)       | recovery (%) | RSD (%) |
|--------|--------------|-----------------------|--------------|---------|
| 1      | 5.0          | 4.6                   | 92.0         | 1.4     |
| 2      | 1.0          | 1.08                  | 107.9        | 3.5     |
| 3      | 0.1          | $1.09 \times 10^{-1}$ | 109.2        | 3.7     |
| 4      | 0.01         | $1.04 \times 10^{-2}$ | 104.1        | 4.8     |
| 5      | 0.001        | $1.01 \times 10^{-3}$ | 101.0        | 2.2     |

**Table S5.** Recovery studies of M.SssI in the spiked A549 cell extracts.

| sample | added (U/mL) | measured (U/mL)       | recovery (%) | RSD (%) |
|--------|--------------|-----------------------|--------------|---------|
| 1      | 5.0          | 4.89                  | 97.8         | 1.3     |
| 2      | 1.0          | 1.06                  | 106.4        | 3.3     |
| 3      | 0.1          | $9.72 \times 10^{-1}$ | 97.2         | 2.5     |
| 4      | 0.01         | $9.73 \times 10^{-3}$ | 97.3         | 2.0     |
| 5      | 0.001        | $99.1 \times 10^{-4}$ | 99.1         | 1.7     |

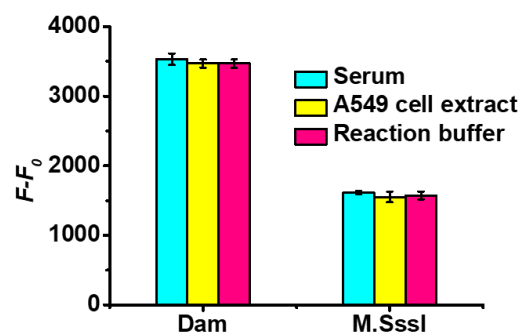

**Fig. S5** Measurement of the  $F-F_0$  value in response to serum (cyan column), A549 cell extract (yellow column), and reaction buffer (pink column) spiked with Dam and M.SssI, respectively. The 5 U/mL Dam and 5 U/mL M.SssI are used in the experiments. Error bars show the standard deviation of three experiments.

**Table S6.** Raw data for Fig. S1A, variance of Cy3 and Cy5 fluorescence intensity values with different buffers.<sup>a</sup>

| Buffer | Cy3 fluorescence intensity |       | Cy5 fluorescence intensity |       |
|--------|----------------------------|-------|----------------------------|-------|
|        | $F$                        | $F_0$ | $F$                        | $F_0$ |
| a      | 5720                       | 77.31 | 2246                       | 55.62 |
|        | 5439                       | 76.01 | 2217                       | 53.65 |
|        | 5334                       | 77.80 | 2449                       | 57.31 |
| b      | 1214                       | 75.64 | 398.8                      | 53.31 |
|        | 1231                       | 78.21 | 409.7                      | 56.82 |
|        | 1250                       | 77.80 | 462.3                      | 57.79 |
| c      | 3479                       | 78.91 | 873.7                      | 54.6  |
|        | 3374                       | 79.52 | 860.9                      | 55.72 |
|        | 3420                       | 80.12 | 890.4                      | 59.30 |
| d      | 1869                       | 73.58 | 506.3                      | 55.64 |
|        | 1781                       | 75.40 | 546.1                      | 58.21 |
|        | 1800                       | 82.56 | 597.8                      | 57.60 |
| e      | 1631                       | 77.89 | 350.8                      | 60.48 |
|        | 1773                       | 80.12 | 321.4                      | 51.83 |
|        | 1611                       | 81.30 | 374.6                      | 56.79 |
| f      | 3434                       | 82.15 | 652.5                      | 56.73 |
|        | 3406                       | 77.00 | 628.5                      | 53.28 |
|        | 3476                       | 74.31 | 694.8                      | 57.90 |
| g      | 1249                       | 78.25 | 573.5                      | 51.66 |

|      |       |       |       |
|------|-------|-------|-------|
| 1257 | 77.21 | 597.4 | 55.05 |
| 1268 | 79.25 | 628.3 | 59.84 |

<sup>a</sup> a, 1× SEBuffer Y; b, 1× Dam buffer; c, 1× NEBuffer 2; d, 1× NEBuffer 2 + 1× SEBuffer Y; e, 1× NEBuffer 2 + 1× Dam buffer; f, 1× Dam buffer + 1× SEBuffer Y; g, 1× Dam buffer + 1× NEBuffer 2 + 1× SEBuffer Y.  $F$  is the fluorescence intensity in the presence of DNA MTase, and  $F_0$  is the fluorescence intensity in the absence of DNA MTase.



**Table S7.** Raw data for Fig. S1B, variance of Cy3 and Cy5 fluorescence intensity values with the methylation time.<sup>a</sup>

| methylation time | Cy3 fluorescence intensity |       | Cy5 fluorescence intensity |       |
|------------------|----------------------------|-------|----------------------------|-------|
|                  | $F$                        | $F_0$ | $F$                        | $F_0$ |
| 0.5 h            | 3040                       | 77.37 | 1079                       | 54.19 |
|                  | 3053                       | 79.71 | 1013                       | 54.93 |
|                  | 3260                       | 80.53 | 1098                       | 56.89 |
| 1.0 h            | 3751                       | 74.13 | 1827                       | 56.44 |
|                  | 3656                       | 76.48 | 1812                       | 53.97 |
|                  | 3501                       | 77.80 | 1964                       | 56.50 |
| 1.5 h            | 4174                       | 75.15 | 2035                       | 58.98 |
|                  | 4335                       | 78.92 | 2073                       | 55.28 |
|                  | 4328                       | 76.83 | 2280                       | 56.30 |
| 2.0 h            | 5795                       | 82.16 | 2403                       | 58.31 |
|                  | 5451                       | 75.01 | 2352                       | 53.61 |
|                  | 5802                       | 77.56 | 2610                       | 56.11 |
| 2.5 h            | 5526                       | 78.41 | 2413                       | 57.45 |
|                  | 5861                       | 79.50 | 2387                       | 54.01 |
|                  | 5883                       | 72.51 | 2576                       | 55.52 |

<sup>a</sup>  $F$  is the fluorescence intensity in the presence of DNA MTase, and  $F_0$  is the fluorescence intensity in the absence of DNA MTase.

**Table S8.** Raw data for Fig. S1C, variance of Cy3 fluorescence intensity value with different concentrations of DpnI.<sup>a</sup>

| Concentration of DpnI | Cy3 fluorescence intensity |       |
|-----------------------|----------------------------|-------|
|                       | $F$                        | $F_0$ |
| 4 U                   | 4432                       | 80.30 |
|                       | 4295                       | 76.09 |
|                       | 4253                       | 73.73 |
| 6 U                   | 4738                       | 80.11 |
|                       | 4729                       | 77.24 |
|                       | 4873                       | 76.99 |
| 8 U                   | 5894                       | 83.92 |
|                       | 5451                       | 74.29 |
|                       | 5565                       | 73.92 |
| 10 U                  | 5448                       | 77.89 |
|                       | 5337                       | 73.15 |
|                       | 5682                       | 74.81 |
| 12 U                  | 5418                       | 78.40 |
|                       | 5343                       | 74.66 |
|                       | 5858                       | 76.62 |

<sup>a</sup>  $F$  is the fluorescence intensity in the presence of Dam, and  $F_0$  is the fluorescence intensity in the absence of Dam.

**Table S9.** Raw data for Fig. S1D, variance of Cy5 fluorescence intensity value with different concentrations of Glal.<sup>a</sup>

| Concentration of Glal | Cy5 fluorescence intensity |       |
|-----------------------|----------------------------|-------|
|                       | $F$                        | $F_0$ |
| 6 U                   | 785.6                      | 56.11 |
|                       | 757.4                      | 53.22 |
|                       | 785.7                      | 54.19 |
| 8 U                   | 1373                       | 56.70 |
|                       | 1343                       | 53.72 |
|                       | 1389                       | 53.84 |
| 10 U                  | 2486                       | 56.50 |
|                       | 2543                       | 54.80 |
|                       | 2783                       | 56.80 |
| 12 U                  | 2861                       | 66.23 |
|                       | 2841                       | 62.57 |
|                       | 2728                       | 57.32 |
| 14 U                  | 2275                       | 56.78 |
|                       | 2323                       | 54.40 |
|                       | 2639                       | 59.77 |

<sup>a</sup>  $F$  is the fluorescence intensity in the presence of M. SssI, and  $F_0$  is the fluorescence intensity in the absence of M.

SssI.

**Table S10.** Raw data for Fig. S2A, variance of Cy3 fluorescence intensity value with different concentrations of circular template 1. <sup>a</sup>

| Concentration of circular template 1 | Cy3 fluorescence intensity |       |
|--------------------------------------|----------------------------|-------|
|                                      | $F$                        | $F_0$ |
| 6 nM                                 | 1497                       | 61.73 |
|                                      | 1506                       | 59.18 |
|                                      | 1708                       | 59.95 |
| 18 nM                                | 3710                       | 74.17 |
|                                      | 3656                       | 76.43 |
|                                      | 3359                       | 64.35 |
| 30 nM                                | 5227                       | 76.56 |
|                                      | 5298                       | 74.33 |
|                                      | 5483                       | 73.83 |
| 42 nM                                | 4493                       | 67.47 |
|                                      | 4457                       | 64.09 |
|                                      | 4914                       | 67.88 |
| 54 nM                                | 4750                       | 76.99 |
|                                      | 4754                       | 73.67 |
|                                      | 4960                       | 73.63 |

<sup>a</sup>  $F$  is the fluorescence intensity in the presence of Dam,  $F_0$  is the fluorescence intensity in the absence of Dam.

**Table S11.** Raw data for Fig. S2B, variance of Cy5 fluorescence intensity value with different concentrations of circular template 2. <sup>a</sup>

| Concentration of circular template 2 | Cy5 fluorescence intensity |       |
|--------------------------------------|----------------------------|-------|
|                                      | $F$                        | $F_0$ |
| 6 nM                                 | 1189                       | 60.60 |
|                                      | 1061                       | 58.29 |
|                                      | 957.2                      | 56.31 |
| 18 nM                                | 1350                       | 61.55 |
|                                      | 1352                       | 56.05 |
|                                      | 1381                       | 52.65 |
| 30 nM                                | 2502                       | 59.52 |
|                                      | 2400                       | 54.29 |
|                                      | 2605                       | 56.04 |
| 42 nM                                | 1399                       | 56.16 |
|                                      | 1370                       | 52.11 |
|                                      | 1593                       | 59.94 |
| 54 nM                                | 1132                       | 70.88 |
|                                      | 1112                       | 64.57 |
|                                      | 1203                       | 65.15 |

<sup>a</sup>  $F$  is the fluorescence intensity in the presence of M. SssI, and  $F_0$  is the fluorescence intensity in the absence of M.

SssI.

**Table S12.** Raw data for Fig. S2C, variance of Cy3 and Cy5 fluorescence intensity values with different concentrations of Vent (exo-).<sup>a</sup>

| Concentration of Vent (exo-) | Cy3 fluorescence intensity |       | Cy5 fluorescence intensity |       |
|------------------------------|----------------------------|-------|----------------------------|-------|
|                              | $F$                        | $F_0$ | $F$                        | $F_0$ |
| 0.2 U                        | 1902                       | 67.51 | 1193                       | 57.63 |
|                              | 2306                       | 77.91 | 1135                       | 52.86 |
|                              | 2069                       | 66.54 | 1232                       | 55.79 |
| 0.6 U                        | 5032                       | 79.40 | 1826                       | 62.53 |
|                              | 4921                       | 75.33 | 1815                       | 57.99 |
|                              | 5130                       | 76.09 | 1942                       | 58.16 |
| 1.0 U                        | 5257                       | 82.55 | 2486                       | 55.44 |
|                              | 5216                       | 77.06 | 2543                       | 54.80 |
|                              | 5546                       | 77.38 | 2598                       | 54.19 |
| 1.4 U                        | 5096                       | 127.4 | 2135                       | 109.2 |
|                              | 5105                       | 113.2 | 2117                       | 105.3 |
|                              | 5541                       | 113.1 | 2240                       | 102.9 |
| 1.8 U                        | 4756                       | 130.7 | 2131                       | 118.3 |
|                              | 4797                       | 127.6 | 2087                       | 110.1 |
|                              | 4857                       | 128.1 | 2203                       | 111.3 |

<sup>a</sup>  $F$  is the fluorescence intensity in the presence of DNA MTase, and  $F_0$  is the fluorescence intensity in the absence of DNA MTase.

**Table S13.** Raw data for Fig. S2D, variance of Cy3 and Cy5 fluorescence intensity values with different concentrations of Nb.BtsI. <sup>a</sup>

| Concentration of Nb.BtsI | Cy3 fluorescence intensity |       | Cy5 fluorescence intensity |       |
|--------------------------|----------------------------|-------|----------------------------|-------|
|                          | $F$                        | $F_0$ | $F$                        | $F_0$ |
| 6 U                      | 4810                       | 74.36 | 1452                       | 58.36 |
|                          | 4636                       | 69.80 | 1439                       | 55.26 |
|                          | 4815                       | 71.11 | 1509                       | 55.49 |
| 8 U                      | 4752                       | 73.65 | 1675                       | 59.48 |
|                          | 4734                       | 70.98 | 1681                       | 55.60 |
|                          | 5094                       | 73.99 | 1831                       | 56.70 |
| 10 U                     | 5239                       | 74.39 | 2335                       | 59.27 |
|                          | 5047                       | 69.79 | 2303                       | 55.10 |
|                          | 5616                       | 75.68 | 2395                       | 54.22 |
| 12 U                     | 5193                       | 71.46 | 2307                       | 58.33 |
|                          | 5139                       | 69.53 | 2314                       | 55.58 |
|                          | 5696                       | 75.79 | 2553                       | 58.42 |
| 14 U                     | 4815                       | 73.40 | 2074                       | 58.80 |
|                          | 4853                       | 71.39 | 2101                       | 55.86 |
|                          | 5101                       | 72.52 | 2293                       | 57.40 |

<sup>a</sup>  $F$  is the fluorescence intensity in the presence of DNA MTase, and  $F_0$  is the fluorescence intensity in the absence of DNA MTase.

**Table S14.** Raw data for Fig. S2E, variance of Cy3 and Cy5 fluorescence intensity values with different concentrations of dNTP.<sup>a</sup>

| Concentration of dNTP | Cy3 fluorescence intensity |       | Cy5 fluorescence intensity |       |
|-----------------------|----------------------------|-------|----------------------------|-------|
|                       | $F$                        | $F_0$ | $F$                        | $F_0$ |
| 200 $\mu$ M           | 3913                       | 73.48 | 1052                       | 67.35 |
|                       | 3967                       | 65.08 | 998.7                      | 71.84 |
|                       | 4161                       | 69.36 | 1186                       | 62.13 |
| 300 $\mu$ M           | 4484                       | 73.41 | 1234                       | 63.44 |
|                       | 4451                       | 69.10 | 1184                       | 70.01 |
|                       | 4371                       | 67.52 | 1320                       | 63.45 |
| 400 $\mu$ M           | 5239                       | 73.59 | 2634                       | 67.24 |
|                       | 5047                       | 68.07 | 2702                       | 62.92 |
|                       | 5245                       | 68.06 | 2865                       | 63.20 |
| 500 $\mu$ M           | 5548                       | 79.41 | 2660                       | 67.58 |
|                       | 5975                       | 80.35 | 2559                       | 61.67 |
|                       | 6096                       | 81.92 | 2635                       | 61.30 |
| 600 $\mu$ M           | 5575                       | 80.30 | 2597                       | 71.62 |
|                       | 6023                       | 84.07 | 2458                       | 62.24 |
|                       | 6094                       | 82.88 | 2760                       | 69.52 |

<sup>a</sup>  $F$  is the fluorescence intensity in the presence of DNA MTase, and  $F_0$  is the fluorescence intensity in the absence of DNA MTase.



**Table S15.** Raw data for Fig. S3A, variance of Cy3 and Cy5 fluorescence intensity values with different amounts of Endo IV. <sup>a</sup>

| Concentration of Endo IV | Cy3 fluorescence intensity |       | Cy5 fluorescence intensity |       |
|--------------------------|----------------------------|-------|----------------------------|-------|
|                          | $F$                        | $F_0$ | $F$                        | $F_0$ |
| 5 U                      | 4556                       | 81.70 | 1402                       | 67.66 |
|                          | 4502                       | 78.18 | 1461                       | 66.04 |
|                          | 4489                       | 76.71 | 1480                       | 62.92 |
| 10 U                     | 5389                       | 74.24 | 2601                       | 62.47 |
|                          | 5401                       | 71.35 | 2697                       | 63.26 |
|                          | 5557                       | 71.27 | 2710                       | 62.13 |
| 15 U                     | 5130                       | 77.11 | 2634                       | 82.15 |
|                          | 5066                       | 73.30 | 2602                       | 73.58 |
|                          | 5283                       | 73.69 | 2861                       | 74.02 |
| 20 U                     | 5152                       | 80.09 | 2216                       | 71.53 |
|                          | 5184                       | 77.94 | 2234                       | 69.46 |
|                          | 5261                       | 76.58 | 2306                       | 69.17 |
| 25 U                     | 5088                       | 85.91 | 1784                       | 75.68 |
|                          | 5164                       | 83.47 | 1783                       | 72.56 |
|                          | 5305                       | 82.26 | 1889                       | 73.89 |

<sup>a</sup>  $F$  is the fluorescence intensity in the presence of DNA MTase, and  $F_0$  is the fluorescence intensity in the absence of DNA MTase.

**Table S16.** Raw data for Fig. S3B, variance of Cy3 fluorescence intensity value with different concentrations of signal probe 1.<sup>a</sup>

| Concentration of signal probe 1 | Cy3 fluorescence intensity |       |
|---------------------------------|----------------------------|-------|
|                                 | $F$                        | $F_0$ |
| 200 nM                          | 2486                       | 54.04 |
|                                 | 2445                       | 51.41 |
|                                 | 2545                       | 51.85 |
| 300 nM                          | 3255                       | 60.55 |
|                                 | 3143                       | 56.97 |
|                                 | 3277                       | 57.99 |
| 400 nM                          | 4010                       | 65.34 |
|                                 | 4026                       | 63.36 |
|                                 | 4156                       | 63.23 |
| 500 nM                          | 5795                       | 83.27 |
|                                 | 5451                       | 75.46 |
|                                 | 5865                       | 77.31 |
| 600 nM                          | 4895                       | 95.21 |
|                                 | 5074                       | 96.13 |
|                                 | 5110                       | 94.43 |

<sup>a</sup>  $F$  is the fluorescence intensity in the presence of Dam, and  $F_0$  is the fluorescence intensity in the absence of Dam.

**Table S17.** Raw data for Fig. S3C, variance of Cy5 fluorescence intensity value with different concentrations of signal probe 2. <sup>a</sup>

| Concentration of signal probe 2 | Cy5 fluorescence intensity |       |
|---------------------------------|----------------------------|-------|
|                                 | $F$                        | $F_0$ |
| 200 nM                          | 907.8                      | 65.29 |
|                                 | 923.9                      | 61.36 |
|                                 | 1037                       | 64.10 |
| 300 nM                          | 1109                       | 67.87 |
|                                 | 1180                       | 66.77 |
|                                 | 1176                       | 61.92 |
| 400 nM                          | 1581                       | 60.87 |
|                                 | 1668                       | 60.32 |
|                                 | 1780                       | 63.32 |
| 500 nM                          | 2675                       | 64.21 |
|                                 | 2738                       | 63.24 |
|                                 | 2768                       | 61.63 |
| 600 nM                          | 2557                       | 91.13 |
|                                 | 2591                       | 87.80 |
|                                 | 2691                       | 86.92 |

<sup>a</sup>  $F$  is the fluorescence intensity in the presence of M.SssI, and  $F_0$  is the fluorescence intensity in the absence of M.SssI.

**Table S18.** Raw data for Fig. S4, variance of Cy3 and Cy5 fluorescence intensity values in response to 40 U/mL Dam + 40 U/mL M.SssI, 40 U/mL Dam, 40 U/mL M.SssI, 40 U/mL UDG, 40 U/mL PNK, 10 µg/mL IgG ,10 µg/mL BSA , respectively. <sup>a</sup>

| Sample       | Cy3 fluorescence intensity |                       | Cy5 fluorescence intensity |                       |
|--------------|----------------------------|-----------------------|----------------------------|-----------------------|
|              | <i>F</i>                   | <i>F</i> <sub>0</sub> | <i>F</i>                   | <i>F</i> <sub>0</sub> |
| Dam + M.SssI | 5239                       | 77.56                 | 2634                       | 70.30                 |
|              | 5047                       | 79.89                 | 2702                       | 68.32                 |
|              | 5146                       | 79.61                 | 2630                       | 76.01                 |
| Dam          | 5227                       | 74.57                 | 73.02                      | 61.23                 |
|              | 5298                       | 77.89                 | 79.14                      | 59.65                 |
|              | 5255                       | 73.23                 | 70.44                      | 63.13                 |
| M.SssI       | 78.42                      | 74.23                 | 2486                       | 75.60                 |
|              | 75.95                      | 69.56                 | 2453                       | 77.32                 |
|              | 77.56                      | 72.50                 | 2493                       | 73.26                 |
| UDG          | 75.44                      | 68.30                 | 82.97                      | 63.94                 |
|              | 86.54                      | 66.22                 | 89.51                      | 73.19                 |
|              | 78.23                      | 67.94                 | 85.55                      | 68.31                 |
| PNK          | 86.88                      | 63.13                 | 119.6                      | 70.12                 |
|              | 86.89                      | 65.12                 | 121.6                      | 68.65                 |
|              | 85.22                      | 62.12                 | 115.2                      | 69.50                 |
| IgG          | 80.55                      | 60.52                 | 96.54                      | 72.33                 |
|              | 79.63                      | 61.69                 | 90.17                      | 70.26                 |

|     |       |       |       |       |
|-----|-------|-------|-------|-------|
|     | 79.66 | 58.59 | 98.44 | 68.57 |
|     | 99.94 | 58.66 | 82.64 | 56.60 |
| BSA | 86.89 | 63.32 | 80.10 | 60.87 |
|     | 87.01 | 57.21 | 79.17 | 54.93 |

<sup>a</sup>  $F$  is the fluorescence intensity in the presence of DNA MTase, and  $F_0$  is the fluorescence intensity in the absence of DNA MTase.

**Table S19.** Raw data for Fig. S5, variance of Cy3 and Cy5 fluorescence intensity values in response to serum, A549 cell extract, and reaction buffer spiked with Dam and M.SssI, respectively. <sup>a</sup>

| Sample          | Cy3 fluorescence intensity |       | Cy5 fluorescence intensity |       |
|-----------------|----------------------------|-------|----------------------------|-------|
|                 | $F$                        | $F_0$ | $F$                        | $F_0$ |
| Serum           | 3549                       | 75.84 | 1670                       | 69.30 |
|                 | 3667                       | 74.74 | 1702                       | 72.55 |
|                 | 3491                       | 78.35 | 1653                       | 70.79 |
| A549            | 3505                       | 78.66 | 1676                       | 78.99 |
|                 | 3587                       | 79.81 | 1567                       | 71.30 |
|                 | 3500                       | 80.21 | 1687                       | 75.42 |
| reaction buffer | 3483                       | 79.30 | 1638                       | 68.92 |
|                 | 3567                       | 80.45 | 1695                       | 74.13 |
|                 | 3565                       | 81.99 | 1615                       | 69.56 |

<sup>a</sup>  $F$  is the fluorescence intensity in the presence of DNA MTase, and  $F_0$  is the fluorescence intensity in the absence of DNA MTase.

## References

1. (a) H. Jia, Z. Li, C. Liu and Y. Cheng, *Angew Chem Int Ed Engl*, 2010, **49**, 5498-5501; (b) J. Van Ness, L. K. Van Ness and D. J. Galas, *Proc Natl Acad Sci U S A*, 2003, **100**, 4504-4509.
